# Supplementary material
Source: PubMed Central journal article supplement (PMC8996436)

**Supplementary Figure 1.** Calreticulin treatment did not inhibit osteoclasts proliferation. A. RAW264.7 cells were treated with RANKL to induce osteoclastogenesis in the absence (OC) or presence calreticulin (200ug/ml) for 5 days. The cell growth/death was measured by MTT assay. B. RAW264.7 cells were either left untreated (UT), or treated with RANKL (50ng/ml), or RANKL plus CRT (300ug/ml) for 1 day.

## Supplemental Figure 1:

A.

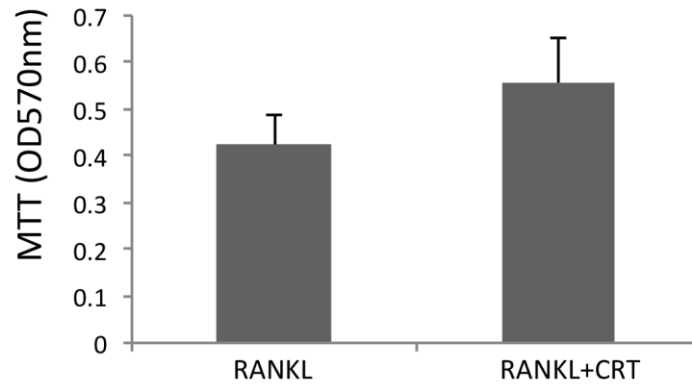

B.

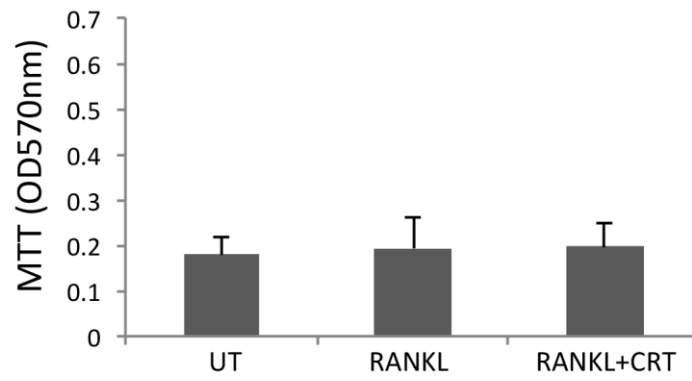

Supplement: NIHMS873207-supplement-supplement_1.pdf [file NIHMS873207-supplement-supplement_1.pdf]
